# Supplementary material for: Polymersome–hydrogel composites with combined quick and long-term antibacterial activities
Source: Royal Society of Chemistry journal article supplement (doi:10.1039/c8tb01608a), 2018-01-01
Supplement: c8tb01608a1.pdf [file c8tb01608a1.pdf]

## Electronic Supplementary Information

# Polymersome-hydrogel composites with combined quick and long-term antibacterial activities

*Yuanxiu Hong,<sup>§ab</sup> Yuejing Xi,<sup>§b</sup> Junxue Zhang,<sup>§b</sup> Dongdong Wang,<sup>a</sup> Hailong Zhang,<sup>a</sup> Ning Yan,<sup>a</sup>*

*Shisheng He<sup>\*a</sup> and Jianzhong Du<sup>\*ab</sup>*

<sup>a</sup> Department of Orthopedics, Shanghai Tenth People's Hospital, Tongji University School of Medicine, 301 Middle Yanchang Road, Shanghai 200072, China. Email: jzdu@tongji.edu.cn (JD); tjhs7418@tongji.edu.cn (SH); Fax: +86-21-6958 0239; Tel: +86-21-6958 0239.

<sup>b</sup> Department of Polymeric Materials, School of Materials Science and Engineering, Key Laboratory of Advanced Civil Engineering Materials of Ministry of Education, Tongji University, 4800 Caoan Road, Shanghai 201804, China.

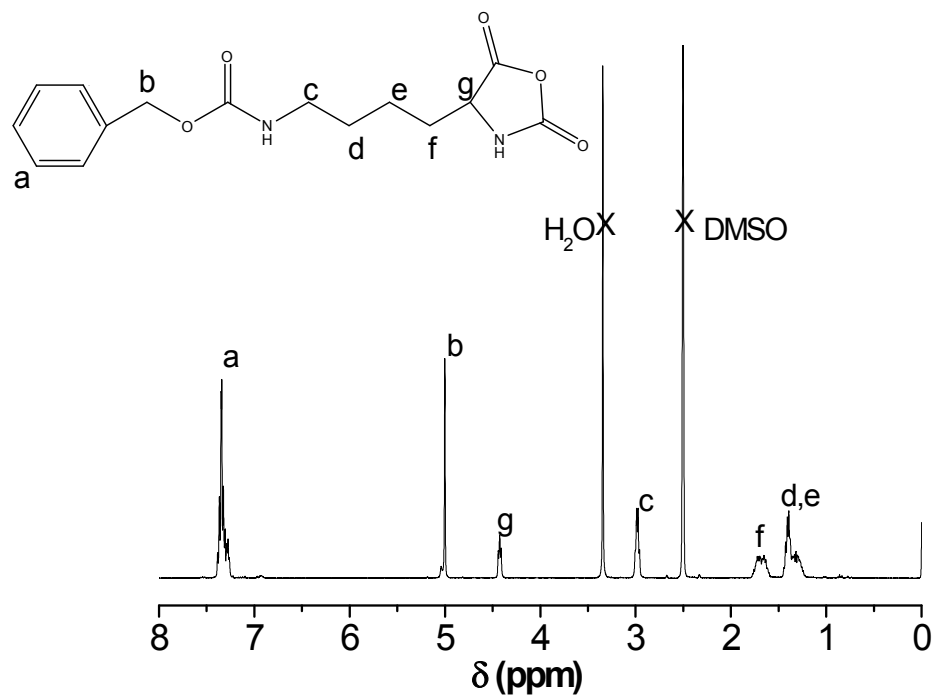

**Fig. S1.** <sup>1</sup>H NMR spectrum of Z-Lys-NCA in DMSO-*d*<sub>6</sub>.

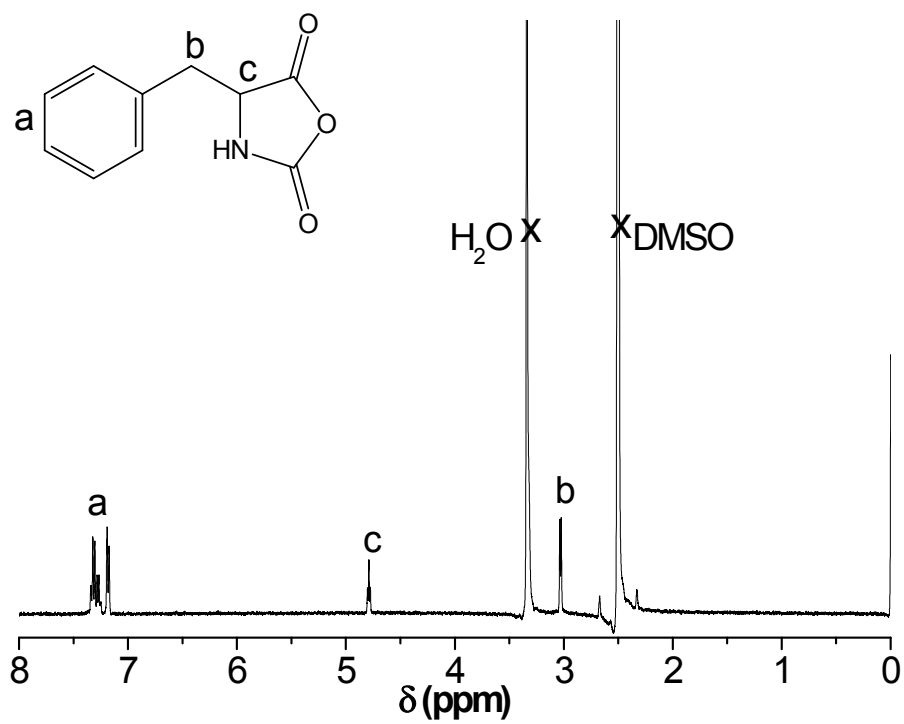

**Fig. S2.** <sup>1</sup>H NMR spectrum of Phe-NCA in DMSO-*d*<sub>6</sub>.

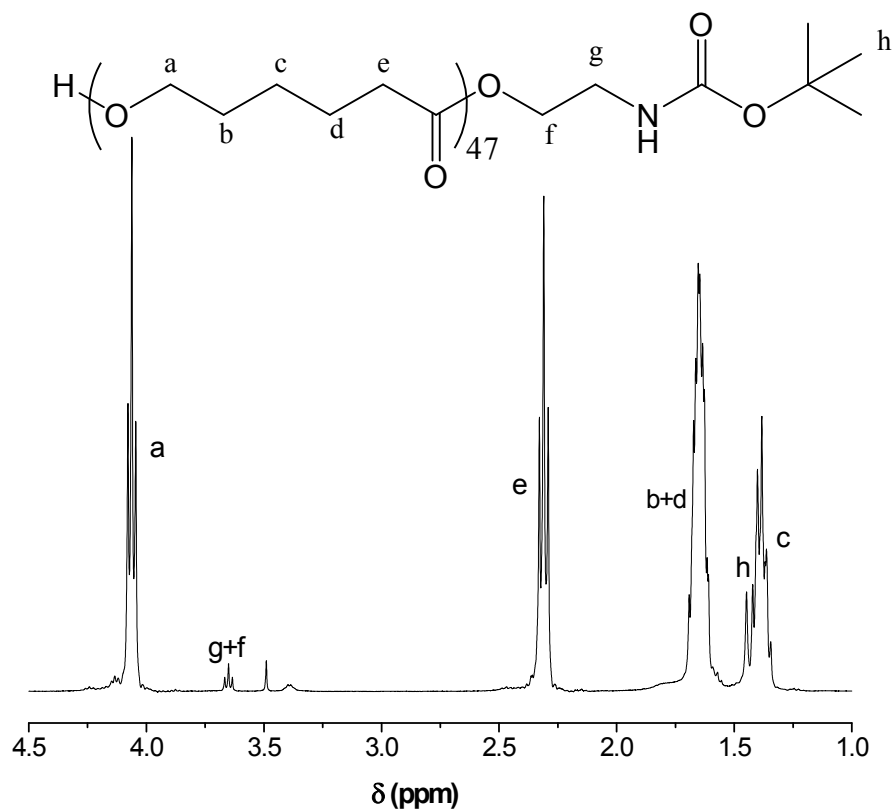

**Fig. S3.** <sup>1</sup>H NMR spectrum of PCL-NH-Boc in CDCl<sub>3</sub>.

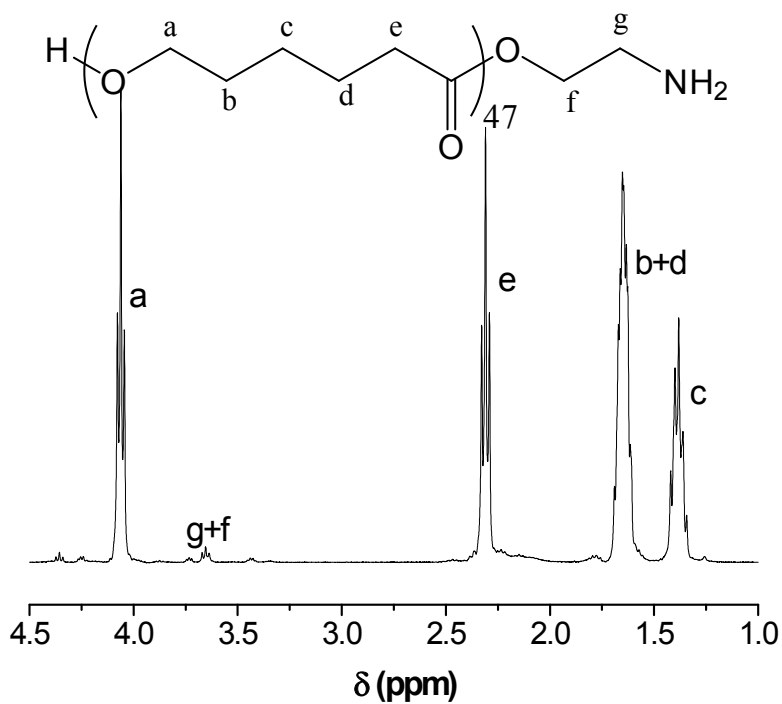

**Fig. S4.** <sup>1</sup>H NMR spectrum of PCL-NH<sub>2</sub> in CDCl<sub>3</sub>.

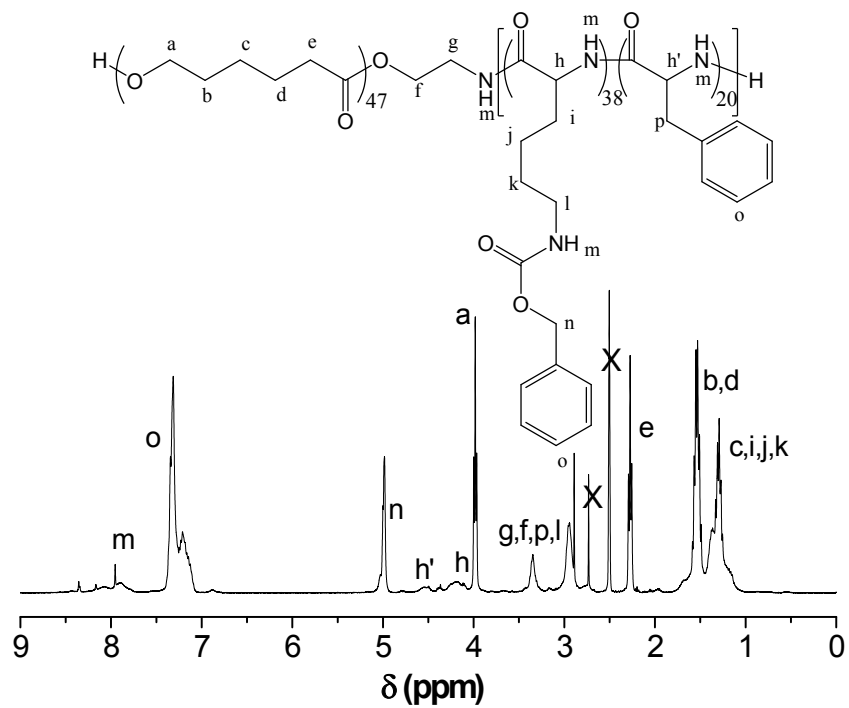

**Fig. S5.** <sup>1</sup>H NMR spectrum of PCL-*b*-P(Z-Lys-*stat*-Phe) in DMSO-*d*<sub>6</sub>.

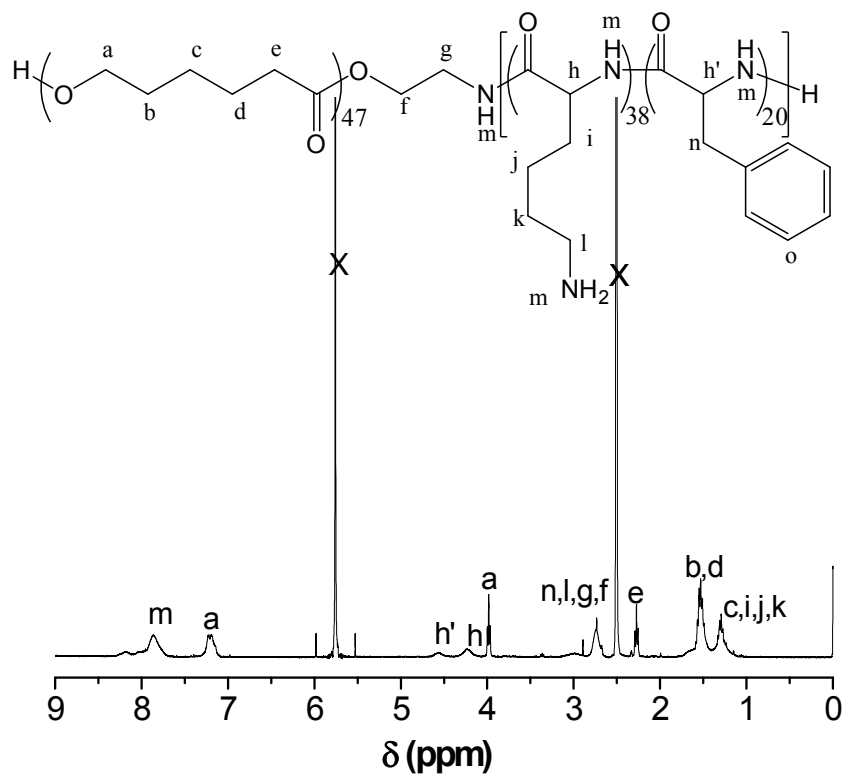

**Fig. S6.** <sup>1</sup>H NMR spectrum of PCL-*b*-P(Lys-*stat*-Phe) in DMSO-*d*<sub>6</sub>.



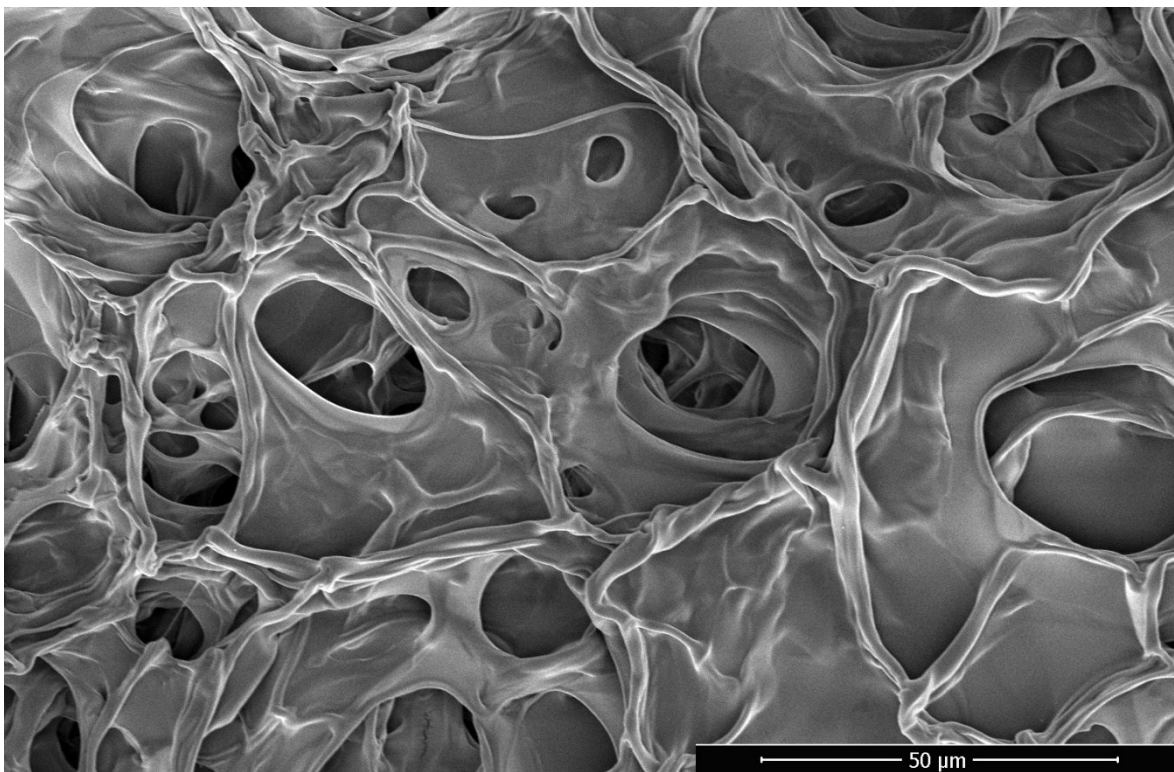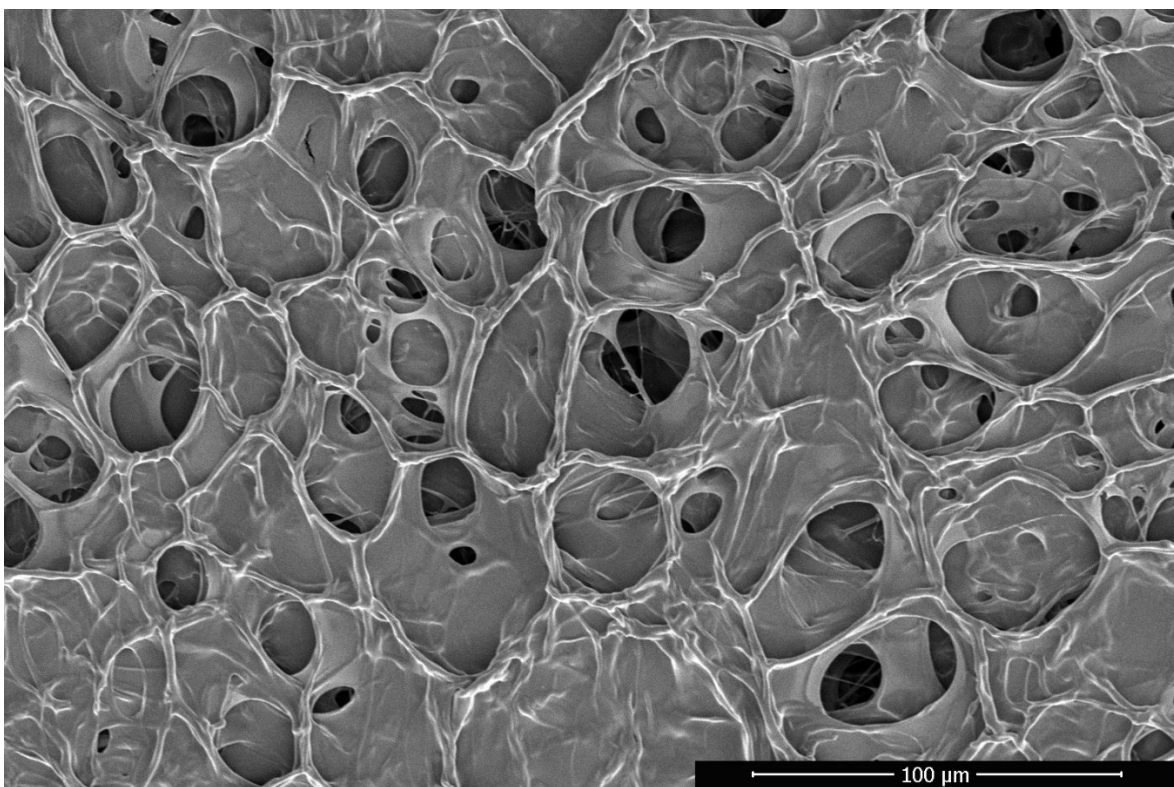

**Fig. S10.** Additional SEM images of freeze-dried hydrogels.

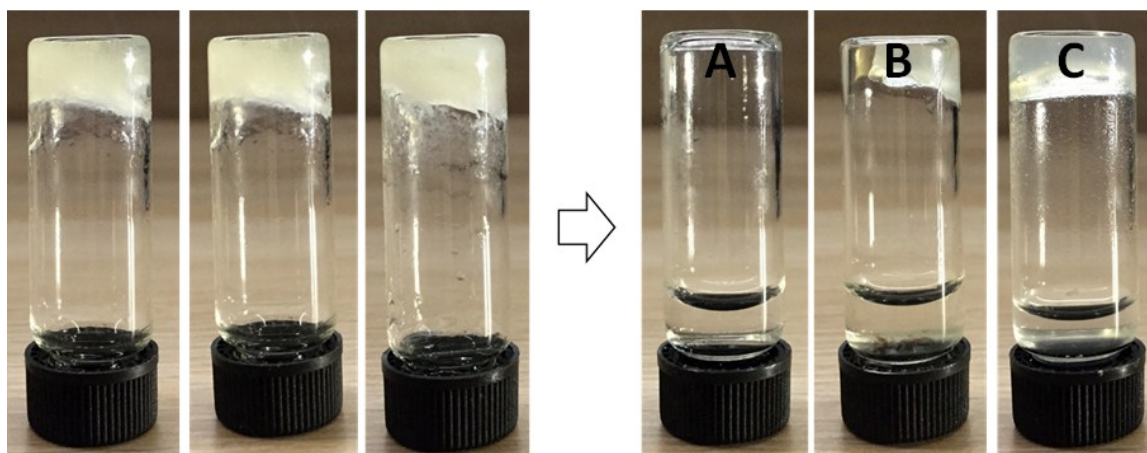

**Fig. S11.** Photographs of hydrogels immersed in (A) 0.1 M HCl; (B) 0.1 M NaOH; (C) deionized water for 12 h.
